# Supplementary material for: Burden of Illness in Follicular Lymphoma with Multiple Lines of Treatment, Italian RWE Analysis
Source: MDPI journal article supplement (doi:10.3390/cancers15174403), 2023-09-02
Supplement: s1 [file s1]

# Burden of illness in follicular lymphoma with multiple lines of treatment, Italian RWE analysis

## Supplementary materials

**Table S1.** Treatments and procedures with the related codes used in patients with follicular lymphoma.

| Treatment                | Identification codes                                                                                                                                                                                |
|--------------------------|-----------------------------------------------------------------------------------------------------------------------------------------------------------------------------------------------------|
| Rituximab ± aspecific CT | ATC codes: L01XC02/L01FA01 <b>OR</b> minsan G00463001 ± aspecific CT (DRG code: 410 <b>OR</b> hospital/ambulatory procedures 99.25, 99.28, <b>OR</b> ATC L01 excluded the treatments listed below). |
| Aspecific CT             | DRG code: 410 <b>OR</b> hospital/ambulatory procedures 99.25, 99.28, <b>OR</b> ATC L01 excluded the treatments listed below                                                                         |
| Obinutuzumab             | ATC code: L01XC15/L01FA03                                                                                                                                                                           |
| Idelalisib               | ATC code: L01EM01                                                                                                                                                                                   |
| Ibritumomab tiuxetan     | ATC code: V10XX02                                                                                                                                                                                   |
| Lenalidomide             | ATC code: L04XA04                                                                                                                                                                                   |
| ASCT                     | ICD-9-CM code (procedures): 41.04 autologous hematopoietic stem cell transplant without purging; 41.07 autologous hematopoietic stem cell transplant with purging                                   |

*Abbreviations:* ATC, Anatomical Therapeutic Chemical (ATC); ASCT, autologous stem cell transplantation; CT, chemotherapy; DRG, Diagnosis Related Group; ICD-9-CM, International Classification of Diseases, Ninth Revision, Clinical Modification.

**Table S2** Demographic and clinical characteristics of patients with follicular lymphoma overall and by year of inclusion. Continuous variables are presented as mean  $\pm$  SD, and categorical variables as numbers and percentages in brackets.

| Characteristics | Overall         | 2015            | 2016            | 2017            | 2018            | 2019            |
|-----------------|-----------------|-----------------|-----------------|-----------------|-----------------|-----------------|
| N               | 7,021           | 1270            | 1263            | 1389            | 1439            | 1453            |
| Age, years      | 65.9 $\pm$ 15.3 | 65.3 $\pm$ 14.5 | 65.7 $\pm$ 15.2 | 65.7 $\pm$ 15.2 | 65.8 $\pm$ 16.2 | 67.0 $\pm$ 15.4 |
| Age range       |                 |                 |                 |                 |                 |                 |
| 18-70 years     | 3,855 (54.9%)   | 750 (59.1%)     | 702 (55.6%)     | 783 (56.4%)     | 773 (53.7%)     | 733 (50.4%)     |
| 71-75 years     | 1,043 (14.9%)   | 188 (14.8%)     | 192 (15.2%)     | 199 (14.3%)     | 202 (14.0%)     | 228 (15.7%)     |
| $\geq 75$ years | 2,123 (30.2%)   | 332 (26.1%)     | 369 (29.2%)     | 407 (29.3%)     | 464 (32.2%)     | 492 (33.9%)     |
| Male gender     | 3,796 (54.1%)   | 657 (51.7%)     | 710 (56.2%)     | 764 (55.0%)     | 765 (53.2%)     | 774 (53.3%)     |
| CCI             | 1.3 $\pm$ 1.7   | 1.4 $\pm$ 1.8   | 1.4 $\pm$ 1.8   | 1.3 $\pm$ 1.7   | 1.3 $\pm$ 1.7   | 1.2 $\pm$ 1.6   |

*Abbreviations:* CCI, Charlson comorbidity index.
